# Supplementary material
Source: PubMed Central journal article supplement (PMC7188567)
Supplement: NIHMS1062955-supplement-supp_info.pdf [file NIHMS1062955-supplement-supp_info.pdf]

**Risk Variants with Opposing Functional Effects Result in Hypomorphic Expression of *TNIP1* and Other Genes within a 3D Chromatin Network**

Satish Pasula, PhD<sup>1</sup>, Kandice L. Tessneer, PhD<sup>1</sup>, Yao Fu, PhD<sup>1</sup>, Jaanam Gopalakrishnan<sup>1,2</sup>, Richard C. Pelikan, PhD<sup>1</sup>, Jennifer A. Kelly, MPH<sup>1</sup>, Graham B. Wiley, PhD<sup>1</sup>, Mandi M. Wiley, PhD<sup>1</sup>, and Patrick M. Gaffney, MD<sup>1,2\*</sup>

<sup>1</sup>Genes and Human Disease Research Program, Oklahoma Medical Research Foundation, Oklahoma City, OK, USA.

<sup>2</sup>Department of Pathology, University of Oklahoma Health Sciences Center, Oklahoma City, OK, USA.

**\*Corresponding Author:** Patrick M. Gaffney, MD, Genes and Human Disease Research Program, Oklahoma Medical Research Foundation; Address: 825 NE 13<sup>th</sup> St, MS 57, Oklahoma City, OK, USA 73104; Phone: 405-271-2572; Fax: 405-271-2536; Email: patrick-gaffney@omrf.org

**Running Title:** *TNIP1* risk variants cumulatively effect gene expression in lupus

**Financial Support:** Research was supported by National Institutes of Health (NIH) grants: AR063124, AR073606, AR056360, GM110766, and AI082714; as well as the Presbyterian Health Foundation.

**COI Disclosures:** None

**Supplementary Figures:** 7

**Supplementary Tables:** 2

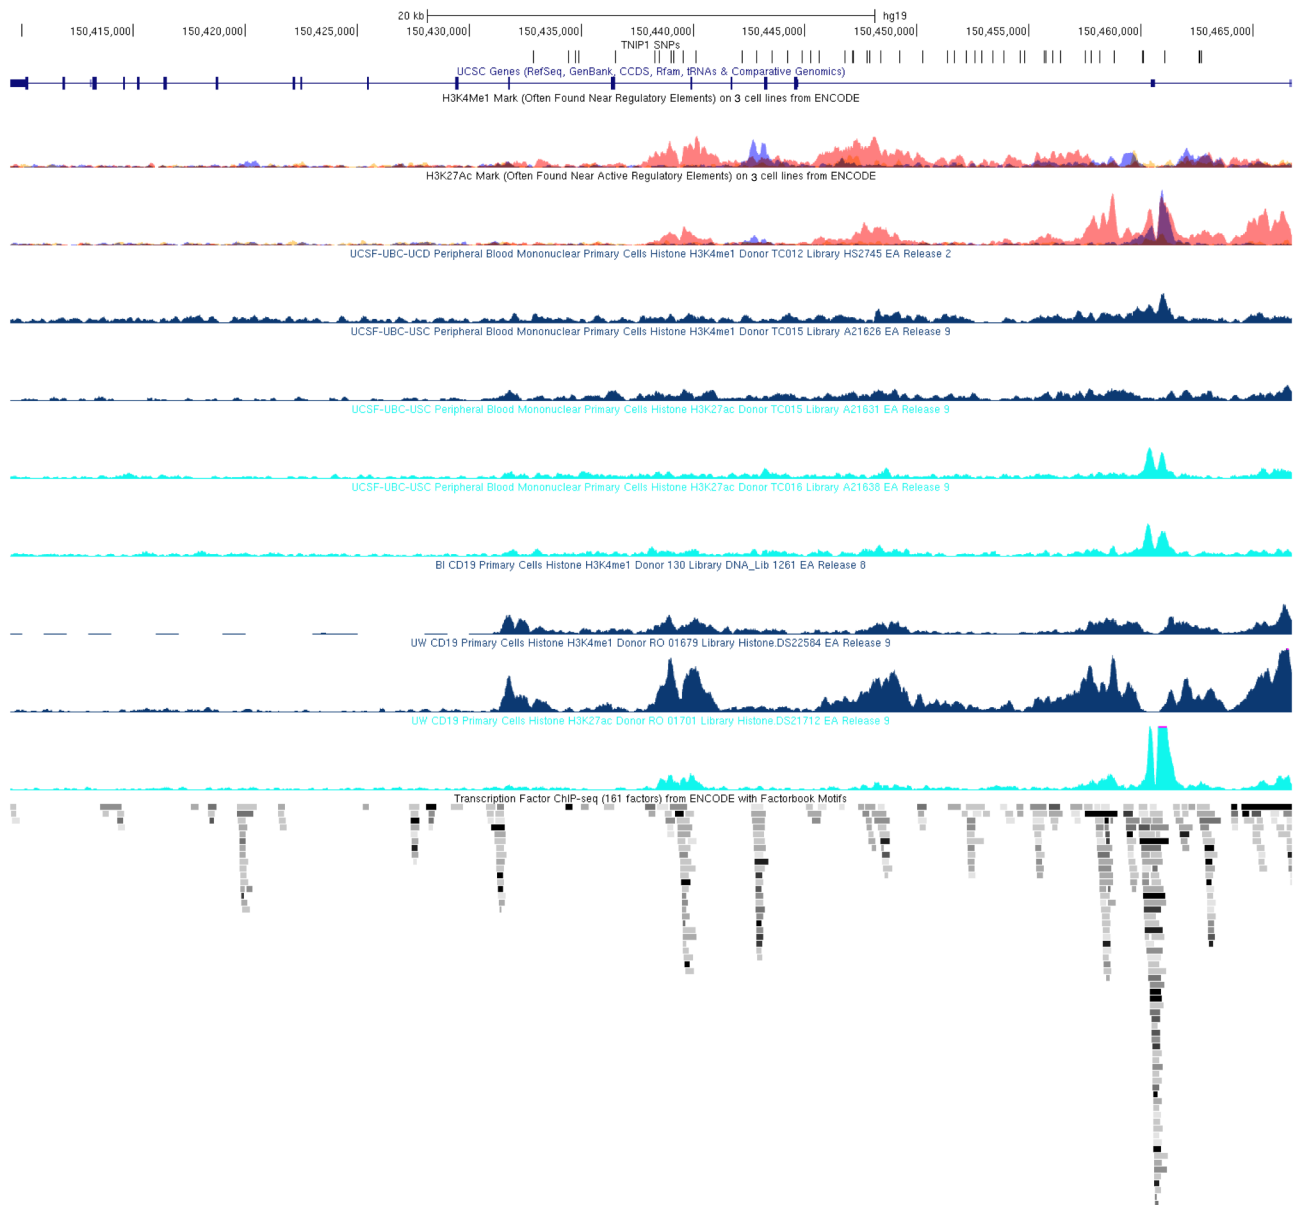

**Supplementary Figure 1. Bioinformatic analysis of 11 SLE risk variants located in regulatory elements of the *TNIP1* locus.**

Eleven of the fifty non-protein-coding SLE risk variants on the *TNIP1* locus were predicted by RegulomeDB to have regulatory functions, and are positioned in enhancer regions identified by enrichment of H3K4me1 and H3K27Ac chromatin marks and ChIP-seq transcription factor binding. Variant positions are indicated on the UCSC Genome Browser tracks: Gene Symbol, custom track of the *TNIP1* SLE risk SNPs, ENCODE H3K4me1 and H3K27Ac chromatin marks for GM12878, H1-hESC, and K562 cell lines, NIH Roadmap Epigenomics H3K4me1 and H3K27Ac chromatin marks for peripheral mononuclear blood cells and primary CD19+ B cells, and ENCODE ChIP-seq transcription factor enrichment.

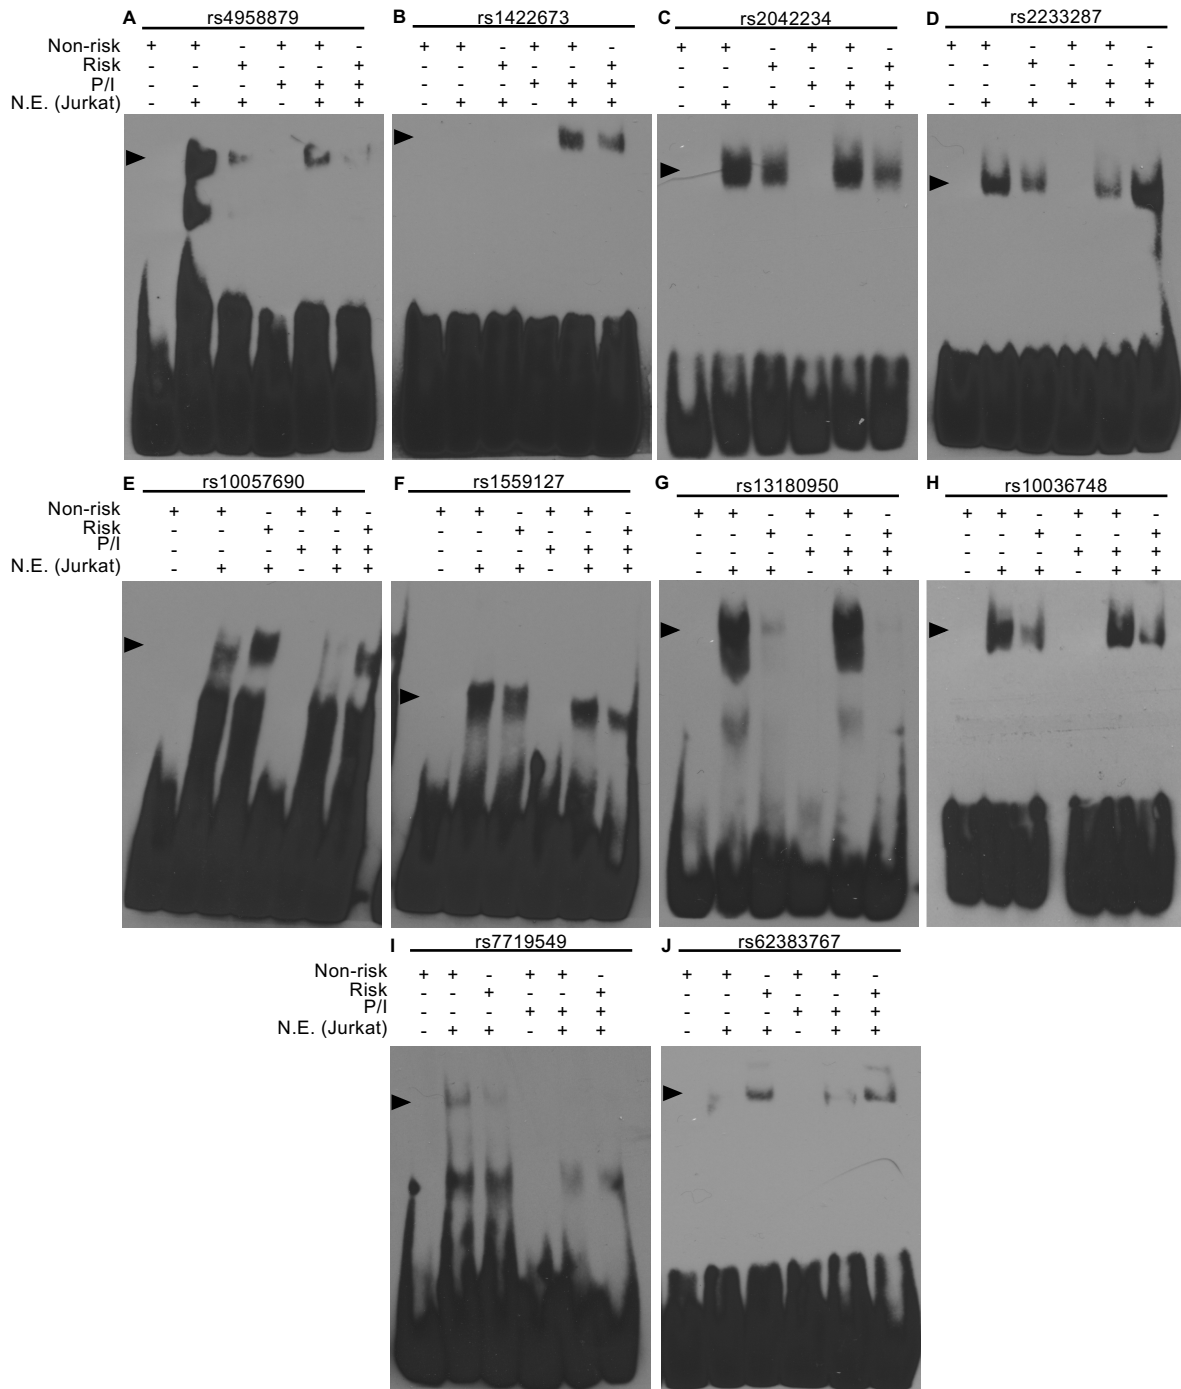

**Supplementary Figure 2. *TNIP1* SLE risk alleles differentially effect nuclear factor binding in Jurkat cells.** EMSAs were performed using biotinylated oligonucleotides containing the non-risk or risk alleles of the indicated variants. Nuclear extracts (N.E.) were from Jurkat cells at rest or stimulated with P/I for 2 h. Representative image of n>3.

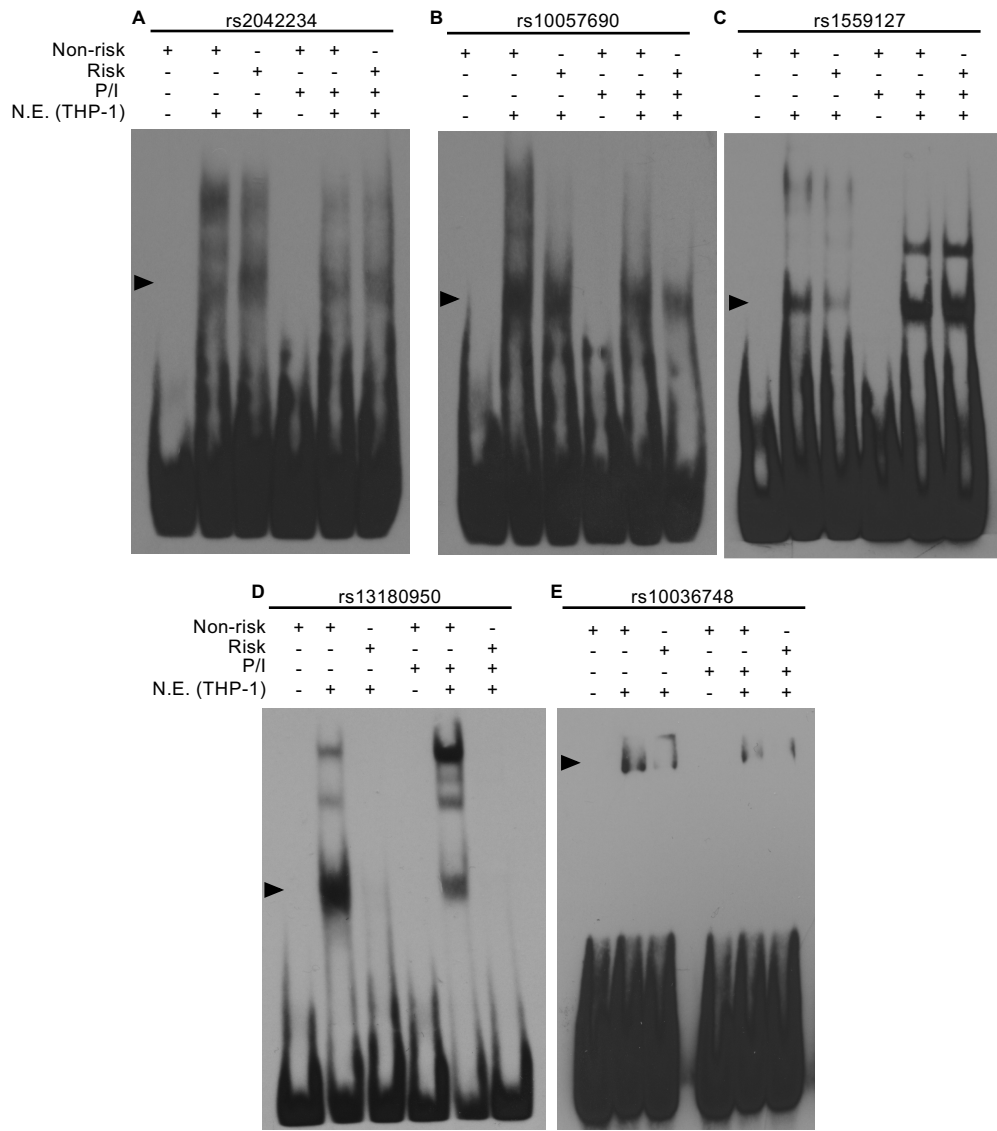

**Supplementary Figure 3. *TNIP1* SLE risk alleles differentially effect nuclear factor binding in THP-1 cells.** EMSAs were performed using biotinylated oligonucleotides containing the non-risk or risk alleles of the indicated variants. Nuclear extracts (N.E.) were from THP-1 cells at rest or stimulated with P/I for 2 h. Representative image of n>3.

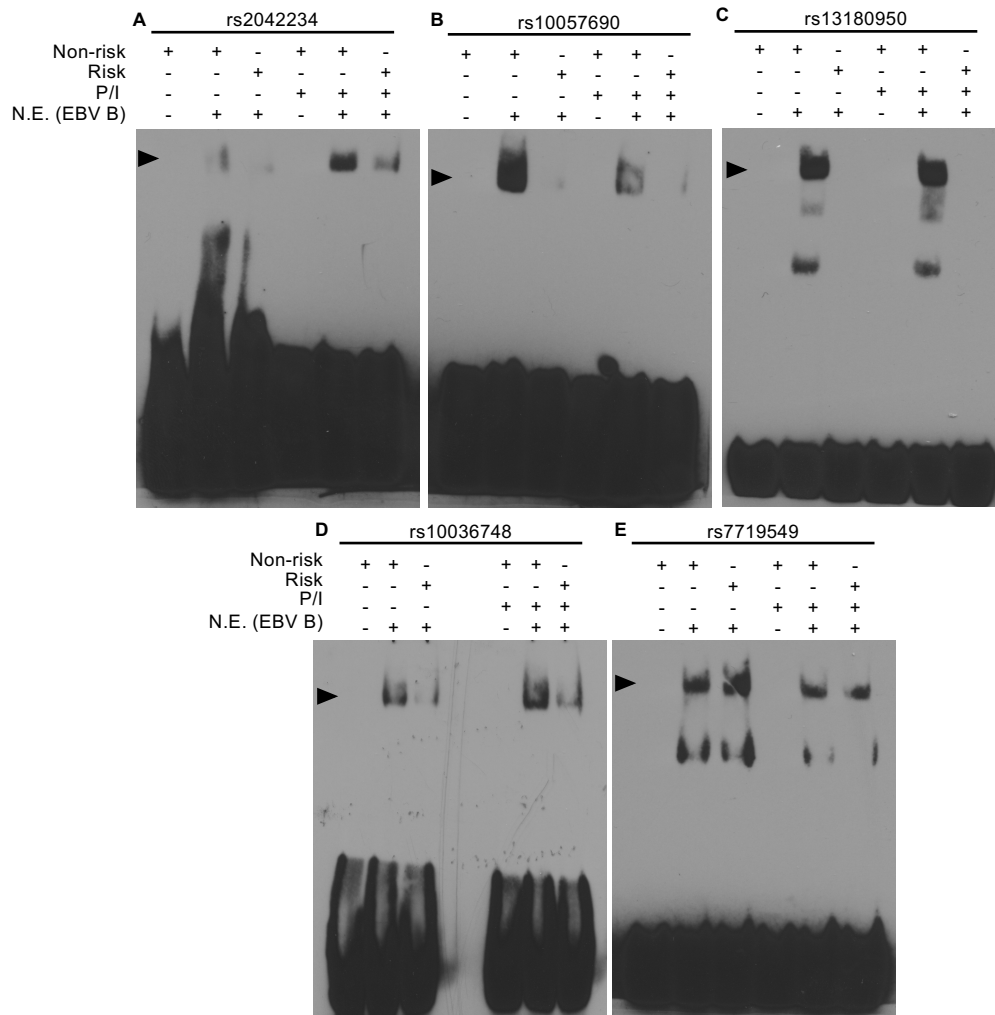

**Supplementary Figure 4. *TNIP1* SLE risk alleles differentially effect nuclear factor binding in EBV B cells.** EMSAs were performed using biotinylated oligonucleotides containing the non-risk or risk alleles of the indicated variants. Nuclear extracts (N.E.) were derived from EBV B cells at rest or stimulated with P/I for 2 h. Representative image of n>3.

| Biotin-Labelled Probes:          | Non-Risk |   |     |      |      |     | Risk     |      |   |      |     |      |     |     |      |
|----------------------------------|----------|---|-----|------|------|-----|----------|------|---|------|-----|------|-----|-----|------|
| <i>TNIP1</i> rs10036748 variant: | Non-Risk |   |     | Risk |      |     | Non-Risk |      |   | Risk |     |      |     |     |      |
| Unlabeled Probes:                | -        | - | 10X | 50X  | 200X | 10X | 50X      | 200X | - | 10X  | 50X | 200X | 10X | 50X | 200X |
| N.E.:                            | -        | + | +   | +    | +    | +   | +        | +    | + | +    | +   | +    | +   | +   | +    |

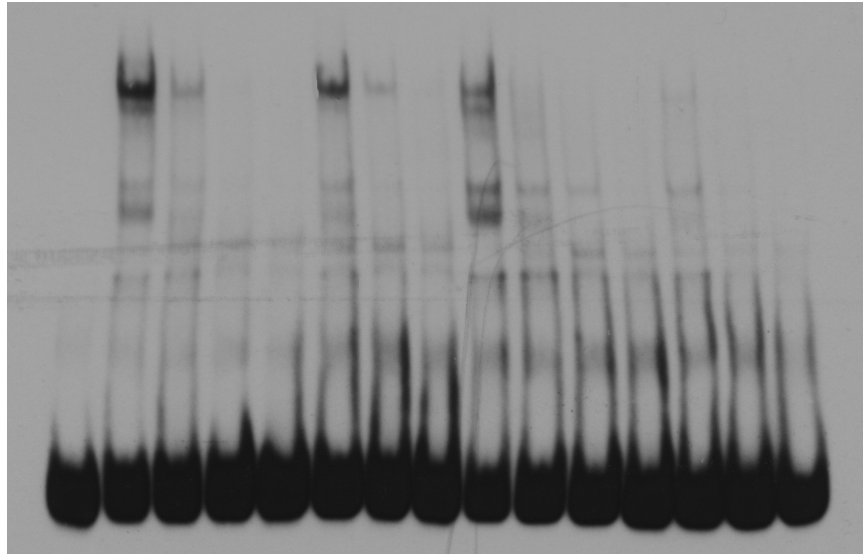

**Supplementary Figure 5. Competition EMSA assay demonstrates nuclear factor binding specificity to rs10036748.** Competition EMSA assay was performed using increasing concentrations of unlabeled oligonucleotides containing the non-risk (G) or risk (A) allele of rs10036748 to compete against biotinylated oligonucleotides containing the non-risk (G) or risk (A) allele of rs10036748. Nuclear extracts (N.E.) were derived from EBV B cells at rest. Representative image of n=3.

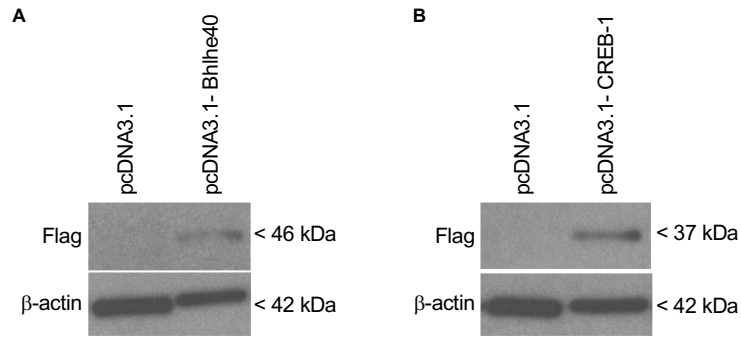

**Supplementary Figure 6. Bhlhe40/DEC1 and CREB-1 overexpression in EBV B cells.** EBV B cells were transiently transfected with empty pcDNA3.1 (**A,B**), pcDNA3.1-Bhlhe40/DEC1 (**A**), or pcDNA3.1-CREB-1 (**B**). Whole cell lysates were separated by SDS-PAGE. Overexpressed flag-tagged Bhlhe40/DEC1 (**A**) or CREB-1 (**B**) was detected by Western blot using an antibody specific against Flag.  $\beta$ -actin was used as a loading control. Images are representative of n=3.

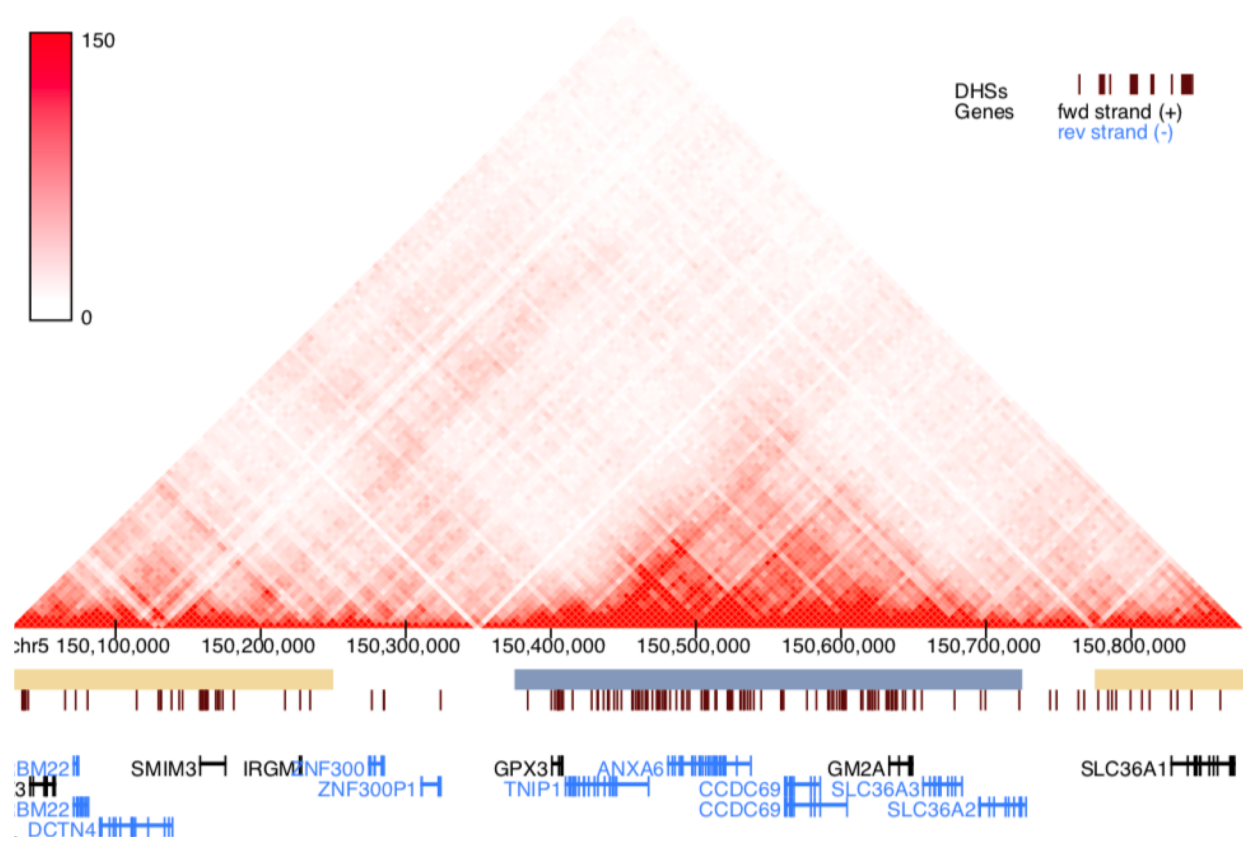

**Supplementary Figure 7. The *TNIP1* locus has a complex chromatin architecture.** Hi-C chromatin looping events at the *TNIP1* locus in the EBV B cell line, GM12878, were visualized as a heatmap. The heatmap was adapted from the Penn State Computational and Functional Genomics/Epigenomics Browser.



Supplementary Table 1. Oligonucleotide Sequences

| EMSA/Affinity<br>Pulldown Probes  | Forward (5' → 3')                                      | Complement/Reverse (5' → 3')                              |
|-----------------------------------|--------------------------------------------------------|-----------------------------------------------------------|
| rs10036748 NR                     | CCCCTTTTTTCACCTTCTGTCCACGTTACTATTTTATTTTCTCATA         | TATGAGAAAAATAAAAATAGTAA <b>CGT</b> GACAGAAAAGTGAAAAAAGGGG |
| rs10036748 R                      | CCCCTTTTTTCACCTTCTGTCCAC <b>A</b> TACTATTTTATTTTCTCATA | TATGAGAAAAATAAAAATAGTAA <b>T</b> GTCAGAAAAGTGAAAAAAGGGG   |
| rs4958879 NR                      | CCAGGCAGTAAAAATACCC <b>A</b> AGATGCCATGTCTCTGGGC       | GCCAGAGACATGGCATCT <b>T</b> GGGTAATTTTACTGCCTGG           |
| rs4958879 R                       | CCAGGCAGTAAAAATACCC <b>G</b> AGATGCCATGTCTCTGGGC       | GCCAGAGACATGGCATCT <b>C</b> GGGTAATTTTACTGCCTGG           |
| rs4958435 NR                      | TTATGGGAATCACAGGACA <b>G</b> CAGAGCTACAGGGAGCCTC       | GAGGCTCCCTGTAGCTCTG <b>C</b> TGTCTCTGTGATTCCCATAA         |
| rs4958435 R                       | TTATGGGAATCACAGGACA <b>T</b> CAGAGCTACAGGGAGCCTC       | GAGGCTCCCTGTAGCTCTG <b>A</b> IGTCTCTGTGATTCCCATAA         |
| rs1422673 NR                      | ACAGCCACTTGAGGGGCC <b>T</b> GCACCTGGCAGCTGACAGG        | CCTGTCAAGTCCCCAGTGC <b>A</b> GGCCCCCTCAGGTGGCTGT          |
| rs1422673 R                       | ACAGCCACTTGAGGGGCC <b>T</b> TGCACCTGGCAGCTGACAGG       | CCTGTCAAGTCCCCAGTGC <b>A</b> GGCCCCCTCAGGTGGCTGT          |
| rs2042234 NR                      | CGCATAACAACAATTAAG <b>A</b> AAAAACTTAAAAGTGGGA         | TCCACATTTTAAAGTTTTT <b>T</b> CITTAATTTGTTTATGCG           |
| rs2042234 R                       | CGCATAACAACAATTAAG <b>G</b> AAAAACTTAAAAGTGGGA         | TCCACATTTTAAAGTTTTT <b>C</b> CITTAATTTGTTTATGCG           |
| rs2233287 NR                      | GTTACATATCATCTCACAT <b>G</b> AGATCACAAGCAGGATTC        | GAATCCTGCTTTGTGATCT <b>C</b> ATGTGAGATGATATGTAAAC         |
| rs2233287 R                       | GTTACATATCATCTCACAT <b>A</b> AGATCACAAGCAGGATTC        | GAATCCTGCTTTGTGATCT <b>T</b> ATGTGAGATGATATGTAAAC         |
| rs10057690 NR                     | TGAAAGTCTTAAGTTAAT <b>T</b> AGTAATCTTTAAAAGTGAAA       | TTTCACTTTAAAAGATTACT <b>A</b> AATTAACCTTAAGACTTTCA        |
| rs10057690 R                      | TGAAAGTCTTAAGTTAAT <b>C</b> AGTAATCTTTAAAAGTGAAA       | TTTCACTTTAAAAGATTACT <b>A</b> AATTAACCTTAAGACTTTCA        |
| rs1559127 NR                      | TCTACAGCATAGCACAAAG <b>T</b> GCAGATGTTTCCACCAGAAC      | GTTCCGGTGAACACATCTG <b>C</b> ACTTTGTGCTATGCTGTAGA         |
| rs1559127 R                       | TCTACAGCATAGCACAAAG <b>C</b> GCAGATGTTTCCACCAGAAC      | GTTCCGGTGAACACATCTG <b>C</b> ACTTTGTGCTATGCTGTAGA         |
| rs13180950 NR                     | GCACCTTGGGAGGCCGAG <b>T</b> GGGGGATCACCTGAGGTC         | GACCTCAGGTGATCCGCC <b>A</b> CCCTCGGCCCTCCCAAAGTGC         |
| rs13180950 R                      | GCACCTTGGGAGGCCGAG <b>G</b> GGGGGATCACCTGAGGTC         | GACCTCAGGTGATCCGCC <b>G</b> CCCTCGGCCCTCCCAAAGTGC         |
| rs7719549 NR                      | CAATAAAAATTATTAATTT <b>C</b> TCTCTCGTGACATATGTAC       | GTACATATGTCACGAGGAG <b>G</b> AAAATAATAATTTTATTTG          |
| rs7719549 R                       | CAATAAAAATTATTAATTT <b>T</b> CCTCTCGTGACATATGTAC       | GTACATATGTCACGAGGAG <b>A</b> AAAATAATAATTTTATTTG          |
| rs62383767 NR                     | TAAACACAGGCTATGAAT <b>G</b> AGCTAATGGGATTCCAATC        | GATTTGGAAATCCCATTAGCT <b>C</b> AATTCATAGCCTGTGTTTA        |
| rs62383767 R                      | TAAACACAGGCTATGAAT <b>A</b> AGCTAATGGGATTCCAATC        | GATTTGGAAATCCCATTAGCT <b>T</b> AATTCATAGCCTGTGTTTA        |
| Scrambled                         | TTTTTACTCACCCCTGCTCTACTTTTGTATACTTACCTCTTATTTT         | AAAATAAGAGGTAAGTATACAAAAGTAGAGACAGGGTGAGTAAAAA            |
| <b>ChIP-qPCR</b>                  | ACATATGCTTTCATTCGCAAA                                  | TACATGCTTTCCTCTGCC                                        |
| <b>Luciferase Cloning Primers</b> |                                                        |                                                           |
| rs10036748                        | ACTGGTACCGGACTAAGGAGGTCCTGCTCA                         | AGTCTCGAGTTCTCATCCTTAGGCTTTCATA                           |
| rs4958879                         | ACTGGTACCCCTTAAAAAAAAGAAATCA                           | AGTCTCGAGATGATTCATCCATTTGGCCGGT                           |
| rs4958435                         | ACTGGTACCCAGTTGGGCTCCCCACTTTA                          | AGTCTCGAGTTCTCCAGAGATTCCAGAGAAAGT                         |
| rs1422673                         | ACTGGTACCTTGCCTCCATGCCCAGCATCTCA                       | AGTCTCGAGATTCTCCCTTCTCCCACTTTTAAAGT                       |
| rs2042234                         | ACTGGTACCCGTAGTTAGCCAGACAGCCA                          | AGTCTCGAGTCTCAATTCACACACCTTACAACACT                       |
| rs2233287                         | ACTGGTACCTCAGGATGACCACATTCAAATT                        | AGTCTCGAGAAAGCAATTTAAAAAGTACACG                           |
| rs10057690                        | ACTGGTACCAAGGATCCCATATGTTTACCCA                        | AGTCTCGAGGACAGACCATATGATATGAGA                            |
| rs1559127                         | ACTGGTACCTTCTCCCAAAAGACTGACAGAT                        | AGTCTCGAGATGCCCGCACCCAGTCAGACACAT                         |
| rs13180950                        | ACTGGTACCGTATACATTTGCTTTTCTTACAGCTG                    | AGTCTCGAGTTACTGCAAATCTCCACCTCCCA                          |
| rs7719549                         | ACTGGTACCTTTTGCAACTCACAGCTGTGT                         | AGTCTCGAGTGGCGGGGTAGCACGCCT                               |
| rs62383767                        | ACTGGTACCAAGGACTTACTTAGGCCACA                          | AGTCTCGAGTCTTGAATGCCACTGTGTGCT                            |

Abbreviations: NR, non-risk; R, risk

Supplementary Table 2. RegulomeDB Scores of Screened *TNIP1* SNPs

| SNP ID            | Chr         | Base pair position | Allele     | Function <sup>1</sup> | RegulomeDB Score <sup>2</sup> | eQTL - Whole Blood <sup>3</sup> |
|-------------------|-------------|--------------------|------------|-----------------------|-------------------------------|---------------------------------|
| rs2001542         | chr5        | 150432859          | C/T        | Intron Variant        | No Score                      | -                               |
| <b>rs4958879</b>  | <b>chr5</b> | <b>150434422</b>   | <b>A/G</b> | <b>Intron Variant</b> | <b>2b</b>                     | -                               |
| rs3792794         | chr5        | 150434722          | C/T        | Intron Variant        | No Score                      | -                               |
| rs6579837         | chr5        | 150434894          | G/T        | Intron Variant        | 5                             | -                               |
| rs2233290         | chr5        | 150436503          | G/C        | Missense Variant      | 5                             | -                               |
| <b>rs4958435</b>  | <b>chr5</b> | <b>150438284</b>   | <b>G/T</b> | <b>Intron Variant</b> | <b>1f</b>                     | -                               |
| rs4958880         | chr5        | 150438477          | C/A        | Intron Variant        | 4                             | -                               |
| <b>rs1422673</b>  | <b>chr5</b> | <b>150438988</b>   | <b>C/T</b> | <b>Intron Variant</b> | <b>2f</b>                     | -                               |
| <b>rs2042234</b>  | <b>chr5</b> | <b>150439131</b>   | <b>A/G</b> | <b>Intron Variant</b> | <b>2b</b>                     | -                               |
| rs3805431         | chr5        | 150439539          | G/A        | Intron Variant        | 4                             | -                               |
| <b>rs2233287</b>  | <b>chr5</b> | <b>150440097</b>   | <b>G/A</b> | <b>Intron Variant</b> | <b>2b</b>                     | -                               |
| rs3792790         | chr5        | 150442171          | C/A        | Intron Variant        | 4                             | YES                             |
| rs4958436         | chr5        | 150442829          | T/C        | Intron Variant        | 4                             | -                               |
| rs17111708        | chr5        | 150443507          | G/A        | Intron Variant        | 5                             | -                               |
| rs7732451         | chr5        | 150444212          | A/G        | Intron Variant        | No Score                      | -                               |
| rs73272818        | chr5        | 150444843          | T/C        | Intron Variant        | No Score                      | -                               |
| <b>rs10057690</b> | <b>chr5</b> | <b>150445215</b>   | <b>T/C</b> | <b>Intron Variant</b> | <b>2b</b>                     | -                               |
| rs1422674         | chr5        | 150445609          | T/G        | Intron Variant        | 5                             | -                               |
| <b>rs1559127</b>  | <b>chr5</b> | <b>150446753</b>   | <b>T/C</b> | <b>Intron Variant</b> | <b>2b</b>                     | -                               |
| rs6880110         | chr5        | 150447090          | A/G        | Intron Variant        | 5                             | -                               |
| rs6861227         | chr5        | 150447128          | T/G        | Intron Variant        | 5                             | -                               |
| rs59926079        | chr5        | 150447743          | A/G        | Intron Variant        | 4                             | -                               |
| rs58474444        | chr5        | 150447880          | T/G        | Intron Variant        | 4                             | -                               |
| rs1862364         | chr5        | 150448376          | A/G        | Intron Variant        | 4                             | -                               |
| rs73272828        | chr5        | 150449220          | C/T        | Intron Variant        | 5                             | -                               |
| rs4958881         | chr5        | 150450236          | T/C        | Intron Variant        | 4                             | -                               |
| rs10700649        | chr5        | 150451348          | C/CCT      | Intron Variant        | 5                             | -                               |
| rs3792785         | chr5        | 150451650          | T/C        | Intron Variant        | 4                             | -                               |
| rs13160369        | chr5        | 150452196          | C/G        | Intron Variant        | 4                             | -                               |
| <b>rs13180950</b> | <b>chr5</b> | <b>150452553</b>   | <b>T/C</b> | <b>Intron Variant</b> | <b>2b</b>                     | -                               |
| rs6869605         | chr5        | 150452866          | A/C        | Intron Variant        | 5                             | -                               |
| rs73272841        | chr5        | 150453384          | C/T        | Intron Variant        | No Score                      | -                               |
| rs73272842        | chr5        | 150453888          | G/A        | Intron Variant        | 5                             | -                               |
| rs1107239         | chr5        | 150454606          | T/A        | Intron Variant        | 4                             | -                               |
| rs4958882         | chr5        | 150454787          | C/G        | Intron Variant        | No Score                      | -                               |
| rs3792784         | chr5        | 150455672          | A/G        | Intron Variant        | 4                             | -                               |
| rs3792783         | chr5        | 150455732          | A/G        | Intron Variant        | 4                             | -                               |
| rs5872188         | chr5        | 150456054          | CAG/C      | Intron Variant        | 4                             | -                               |
| rs7731150         | chr5        | 150456392          | G/A        | Intron Variant        | 4                             | -                               |
| rs7708392         | chr5        | 150457485          | G/C        | Intron Variant        | 5                             | -                               |
| rs6889239         | chr5        | 150457771          | T/C        | Intron Variant        | 4                             | -                               |
| <b>rs10036748</b> | <b>chr5</b> | <b>150458146</b>   | <b>C/T</b> | <b>Intron Variant</b> | <b>3a</b>                     | -                               |
| rs918498          | chr5        | 150458788          | C/T        | Intron Variant        | 4                             | -                               |
| <b>rs7719549</b>  | <b>chr5</b> | <b>150460047</b>   | <b>C/T</b> | <b>Intron Variant</b> | <b>3a</b>                     | -                               |
| rs33934794        | chr5        | 150460089          | GA/G       | Intron Variant        | 4                             | -                               |

|                   |             |                  |            |                       |           |          |
|-------------------|-------------|------------------|------------|-----------------------|-----------|----------|
| rs960709          | chr5        | 150461049        | A/G        | Intron Variant        | 4         | -        |
| rs78717966        | chr5        | 150462574        | GGC/G      | Intron Variant        | N/A       | -        |
| rs62383766        | chr5        | 150462576        | C/A        | Intron Variant        | 4         | -        |
| rs13168551        | chr5        | 150462638        | T/C        | Intron Variant        | 4         | -        |
| <b>rs62383767</b> | <b>chr5</b> | <b>150462705</b> | <b>G/A</b> | <b>Intron Variant</b> | <b>3a</b> | <b>-</b> |

<sup>1</sup>Variant functional prediction was determined from ENCODE data visualized in UCSC Genome Browser.

<sup>2</sup>RegulomeDB scores were determined by importing variant dbSNP IDs into <http://www.regulomedb.org/>.

<sup>3</sup>Whole blood eQTL data was obtained from the GTEx Portal (<https://gtexportal.org/home/>)

Abbreviations: Chr, chromosome; eQTL, expression quantitative trait loci
